# Supplementary material for: Salt-Sensitive Signaling Networks in the Mediation of K+/Na+ Homeostasis Gene Expression in Glycyrrhiza uralensis Roots
Source: PubMed Central journal article supplement (PMC5558103; doi:10.3389/fpls.2017.01403), 2017-08-14
Supplement: Image_1.pdf [file Image_1.pdf]

**Supplemental TABLE 1** | Primer sets used for quantitative real-time PCR

| <b>Gene Name</b>   | <b>GeneBank Accession NO.</b><br>( <i>Glycyrrhiza uralensis</i> ) | <b>Arabidopsis Homolog locus</b> | <b>Primer sets</b> | <b>Sequence (5' to 3')</b> |
|--------------------|-------------------------------------------------------------------|----------------------------------|--------------------|----------------------------|
| <i>GuACT2</i>      | EU190972                                                          | AT5G09810                        | Forward primer     | ATCACAATCGGAGCTGAGAG       |
|                    |                                                                   |                                  | Reverse primer     | ACTTTCTCTCTGGTGGAGCC       |
| <i>GuAHA</i>       | FS240345                                                          | AT5G57350                        | Forward primer     | TATCGGTTATGGCAAGGTCA       |
|                    |                                                                   |                                  | Reverse primer     | GACCCCATCTGACTTCCCTC       |
| <i>GuSOS1</i>      | \                                                                 | AT2G01980                        | Forward primer     | AGCTAAGCACGATAATTGAAG      |
|                    |                                                                   |                                  | Reverse primer     | CATTCCCTACAGCTCCAAGTG      |
| <i>GuCIPK</i>      | FS275069                                                          | AT5G35410                        | Forward primer     | CGTCTACATGAGGTTCTGGC       |
|                    |                                                                   |                                  | Reverse primer     | GTCCGAAGCATACTAACCCC       |
| <i>GuSOS3</i>      | FS990589                                                          | AT5G24270                        | Forward primer     | TCCTTGCTTCTGAAACACCC       |
|                    |                                                                   |                                  | Reverse primer     | AGATGCTCAAGGATCGGACA       |
| <i>GuRbohD</i>     | FS280550                                                          | AT5G47910                        | Forward primer     | CTTGGCTAGCCCTTGGTTTA       |
|                    |                                                                   |                                  | Reverse primer     | ATTCCCAGGATAAACAGCCAC      |
| <i>GuNIR</i>       | FS239202                                                          | AT2G15620                        | Forward primer     | TGTTCGATTTCTCACCCCTC       |
|                    |                                                                   |                                  | Reverse primer     | TAGCCAATTCATCAAGCCCT       |
| <i>GuMAPK</i><br>3 | FS269422                                                          | AT3G45640                        | Forward primer     | GAGGTTACGGCCAAGTATCG       |
|                    |                                                                   |                                  | Reverse primer     | AAACTCTCTACGCAAGGGTG       |
| <i>GuMAPK</i><br>6 | FS279003                                                          | AT2G43790                        | Forward primer     | ATACGAATGAGCATGTCCG        |
|                    |                                                                   |                                  | Reverse primer     | ATTTGGTGAAGGTCGGTGTC       |
